# Supplementary material
Source: PubMed Central journal article supplement (PMC7717887)
Supplement: NIHMS1578365-supplement-Supp_figureS4.pdf [file NIHMS1578365-supplement-Supp_figureS4.pdf]

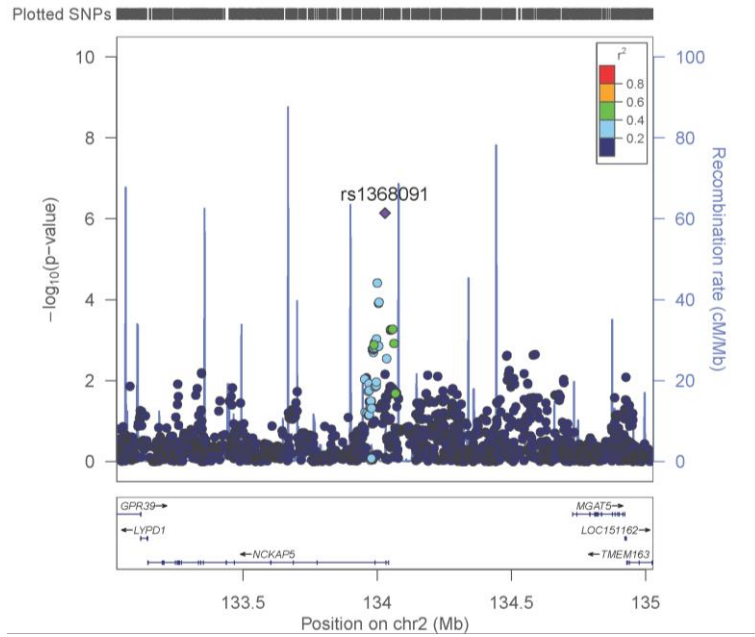

Figure S4: Regional association plot for rs1368091 ± 1000 kb on chromosome 2; -log<sub>10</sub> P-value on y-axis from 1 DF interaction test (gene-DLRS interaction on DBP analysis set)

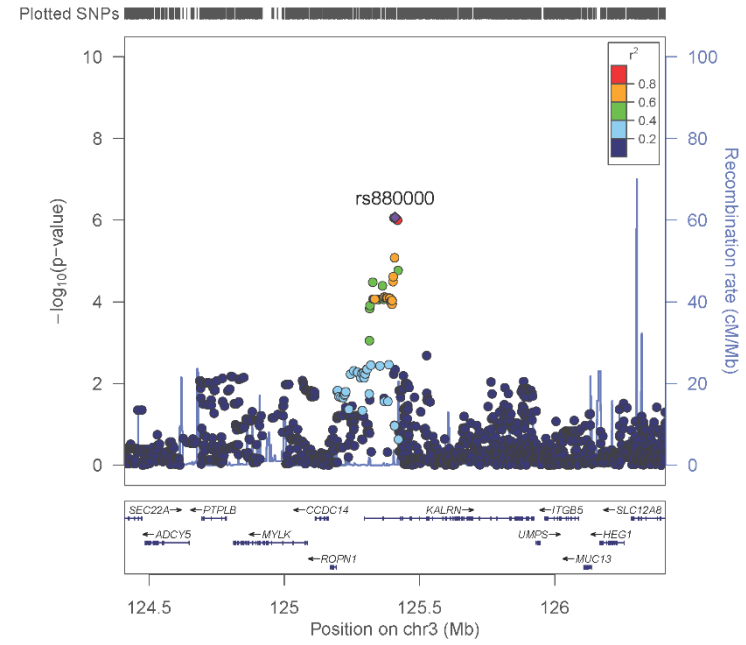

Figure S5: Regional association plot for rs880000 ± 1000 kb on chromosome 3; -log<sub>10</sub> P-value on y-axis from 1 DF interaction test (gene-DLRS interaction on SBP analysis set)

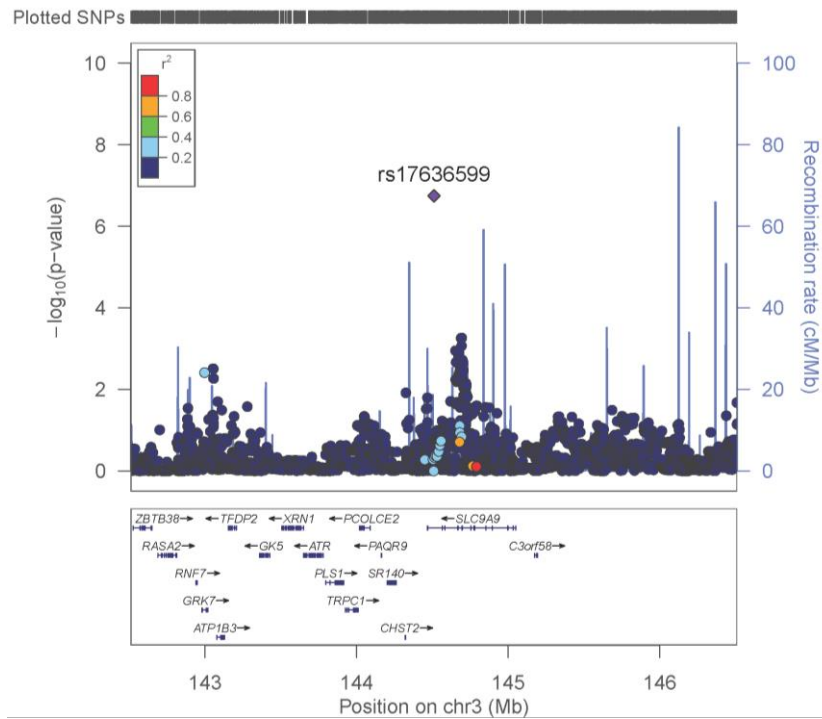

Figure S6: Regional association plot for rs17636599 ± 2000 kb on chromosome 3; -log<sub>10</sub> P-value on y-axis from 2 DF Joint test (gene-QLRS interaction on SBP analysis set)

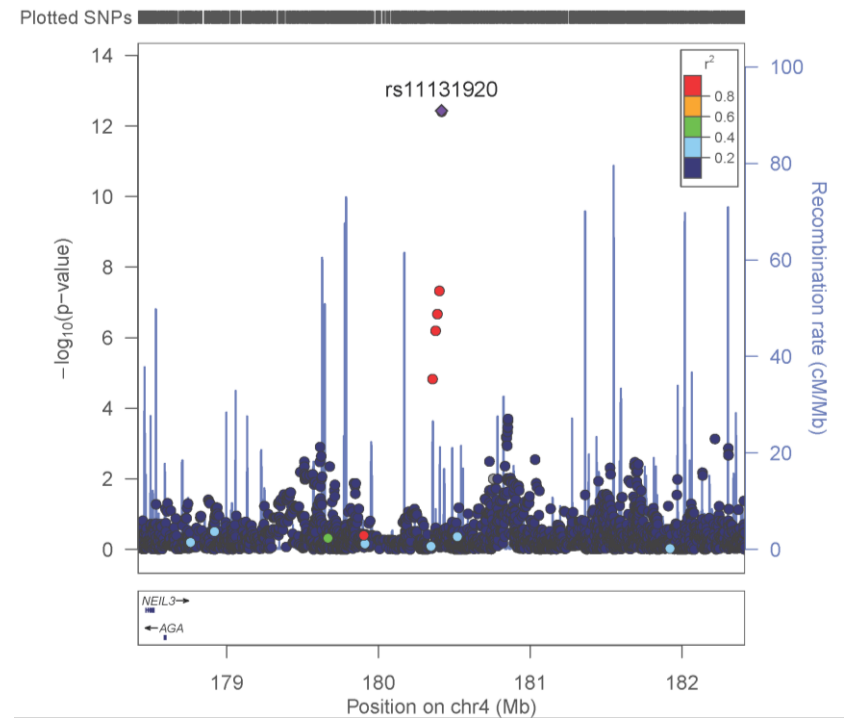

Figure S7: Regional association plot for rs11131920 ± 2000 kb on chromosome 4; -log<sub>10</sub> P-value on y-axis from 2 DF Joint test (gene-DLRS interaction on DBP analysis set)

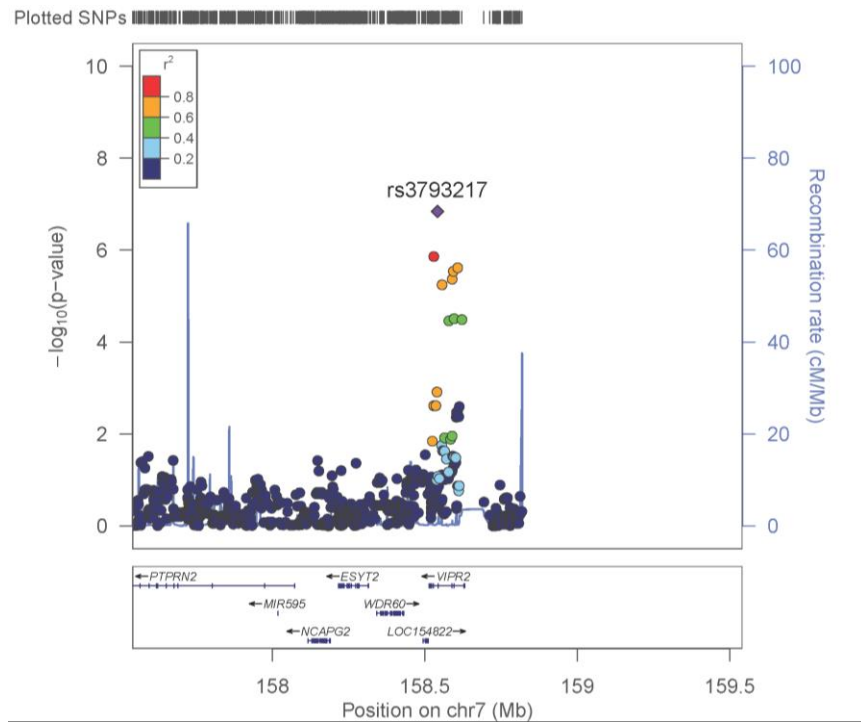

Figure S8: Regional association plot for rs3793217  $\pm$  1000 kb on chromosome 7;  $-\log_{10}$  P-value on y-axis from 1 DF interaction test (gene-QLRS interaction on DBP analysis set)

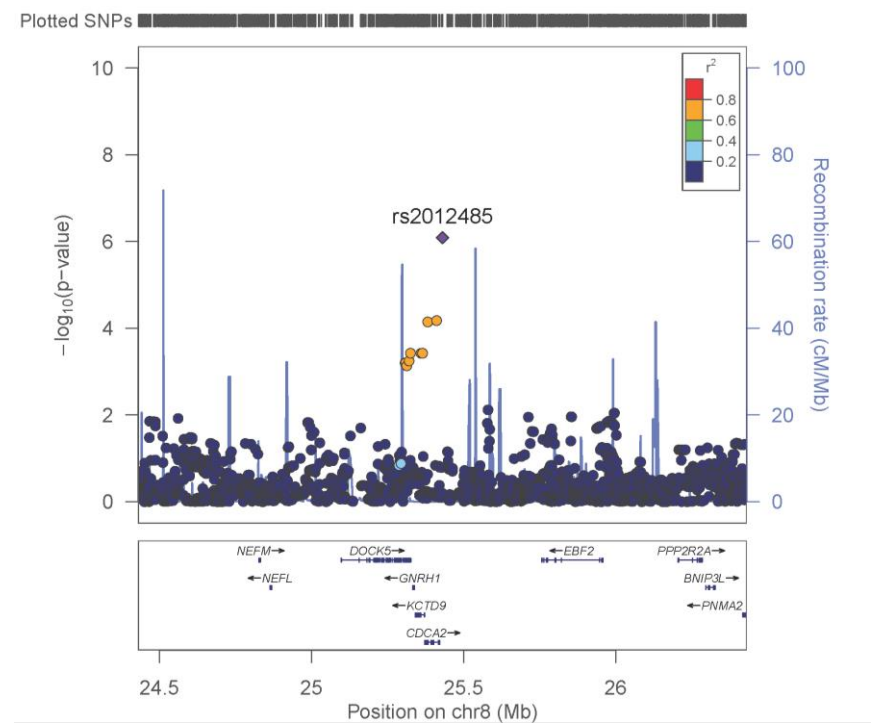

Figure S9: Regional association plot for rs2012485  $\pm$  1000 kb on chromosome 8;  $-\log_{10}$  P-value on y-axis from 1 DF interaction test (gene-QLRS interaction on SBP analysis set)

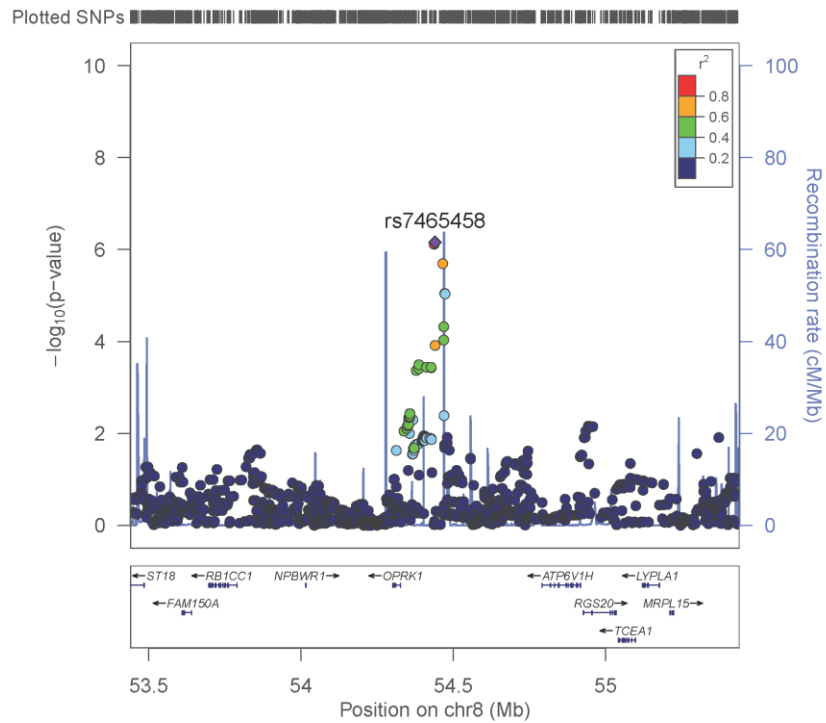

Figure S10: Regional association plot for rs7465458 ± 1000 kb on chromosome 8; -log<sub>10</sub> P-value on y-axis from 2 DF Joint test (gene-QLRS interaction on SBP analysis set)

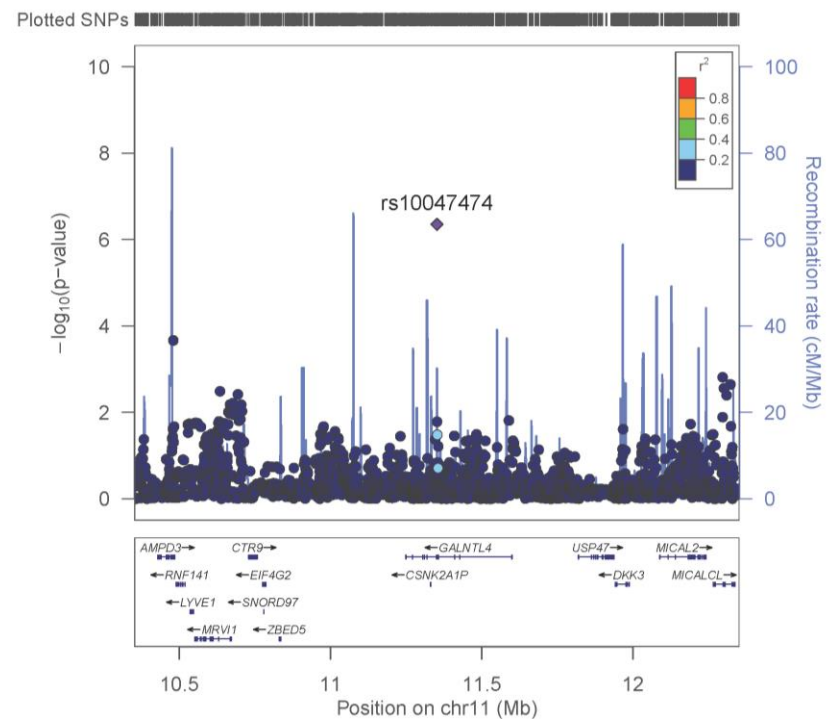

Figure S11: Regional association plot for rs10047474 ± 1000 kb on chromosome 11; -log<sub>10</sub> P-value on y-axis from 2 DF Joint test (gene-QLRS interaction on DBP analysis set)

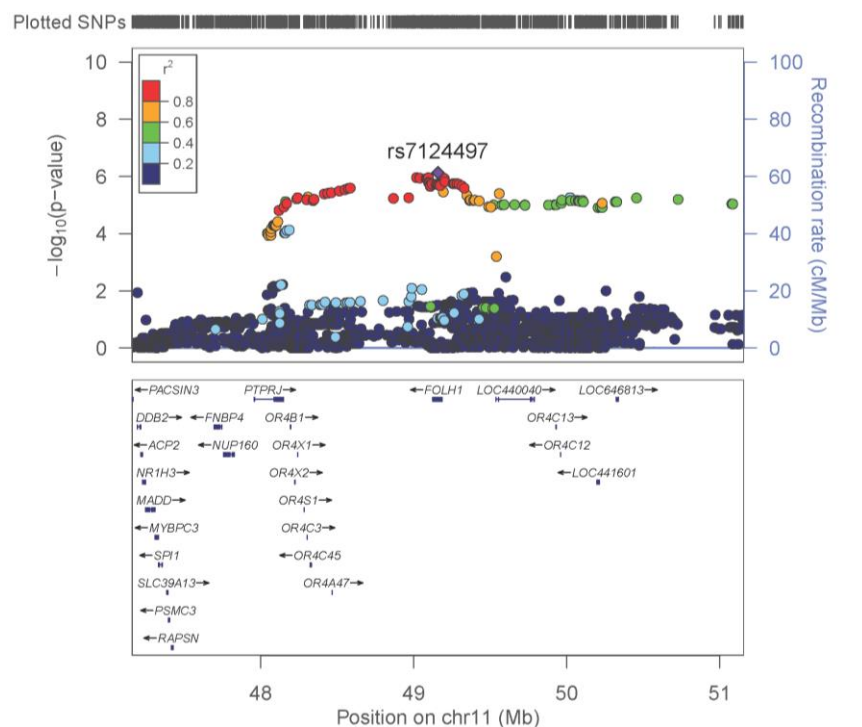

Figure S12: Regional association plot for rs7124497  $\pm$  2000 kb on chromosome 11;  $-\log_{10}$  P-value on y-axis from 2 DF Joint test (gene-DLRS interaction on SBP analysis set)

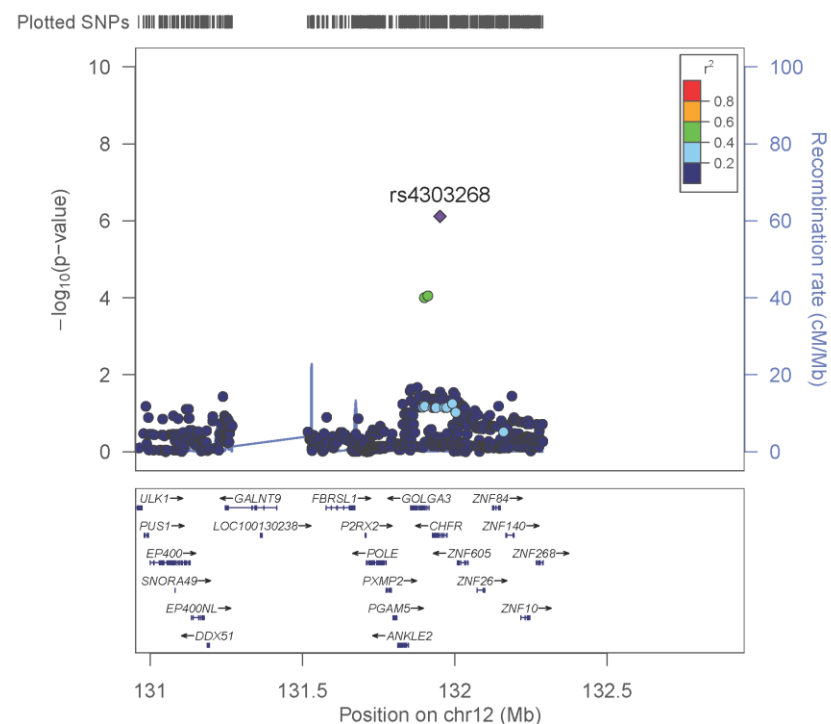

Figure S13: Regional association plot for rs4303268  $\pm$  1000 kb on chromosome 12;  $-\log_{10}$  P-value on y-axis from 1 DF interaction test (gene-QLRS interaction on SBP analysis set)

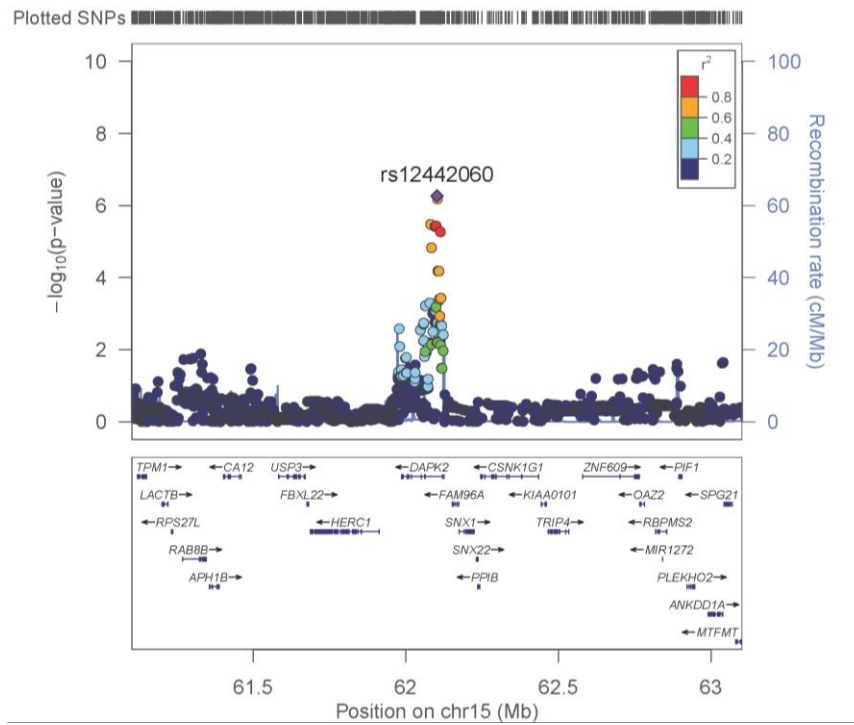

Figure S14: Regional association plot for rs12442060 ± 1000 kb on chromosome 15;  $-\log_{10}$  P-value on y-axis from 1 DF interaction test (gene-DLRS interaction on SBP analysis set)

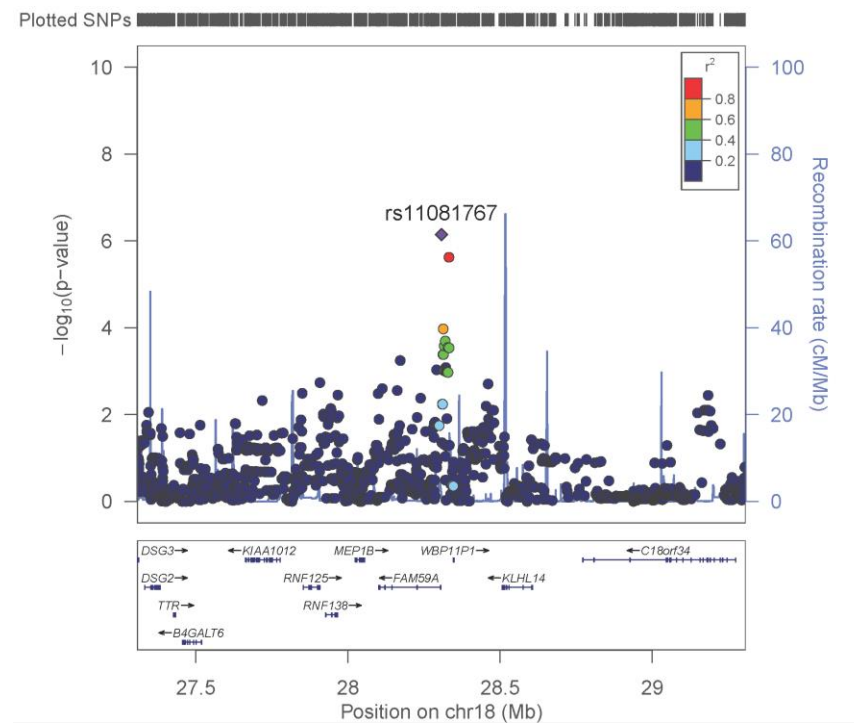

Figure S15: Regional association plot for rs11081767 ± 1000 kb on chromosome 18;  $-\log_{10}$  P-value on y-axis from 1 DF interaction test (gene-QLRS interaction on DBP analysis set)
