# Supplementary material
Source: PubMed Central journal article supplement (PMC7717887)
Supplement: NIHMS1578365-supplement-Supp_figureS16.pdf [file NIHMS1578365-supplement-Supp_figureS16.pdf]

# 4 : 180,179,576 C / T (rs11131921)

Nearest gene: AGA

MAF ranges from 3.3e-3 to 8.7e-3

View on UCSC , GWAS Catalog , dbSNP

**NOTE : p-values in this plot are capped at  $-\log_{10}$  p-value = 30. Please see table below for actual p-value.**

Download Image

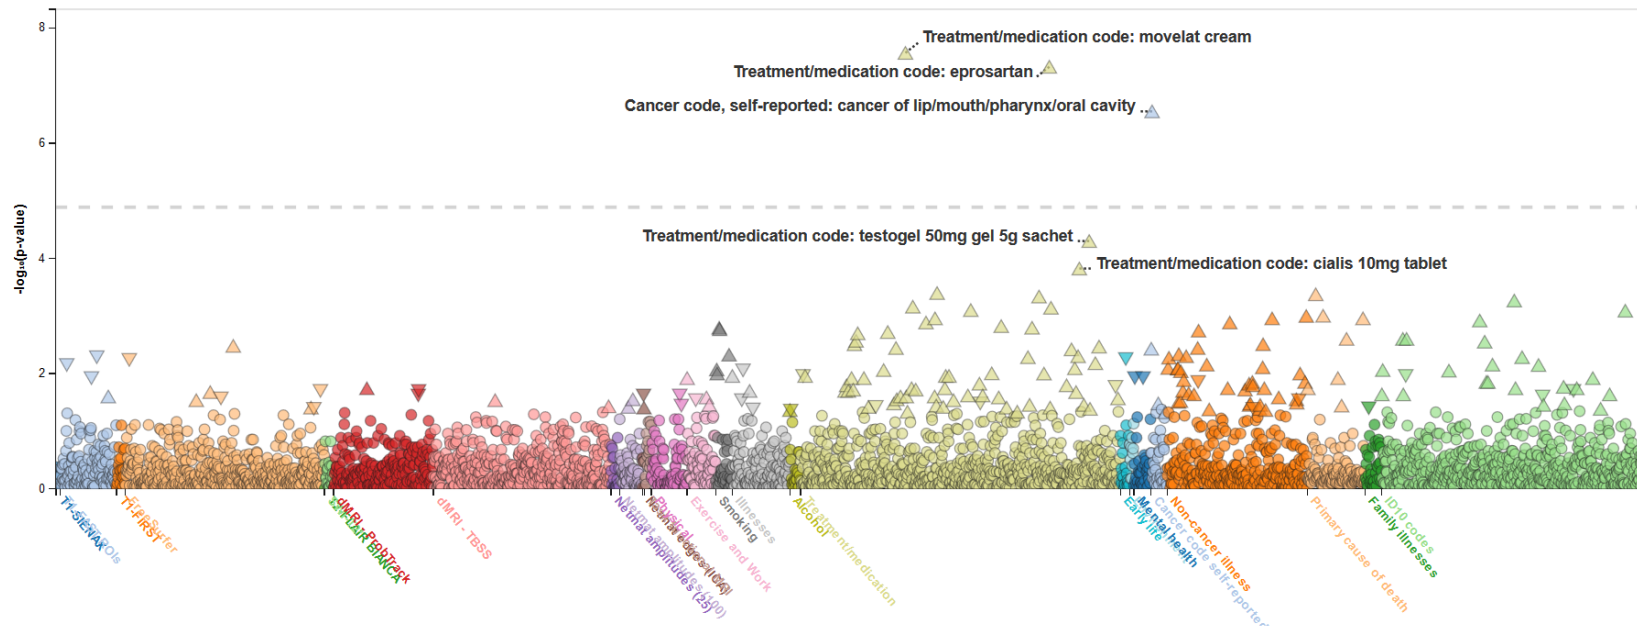

# 4 : 180,164,081 A / G (rs969219)

Nearest gene: AGA

MAF ranges from 5.9e-3 to 8.4e-2

View on UCSC , GWAS Catalog , dbSNP

**NOTE : p-values in this plot are capped at  $-\log_{10} p\text{-value} = 30$ . Please see table below for actual p-value.**

Download Image

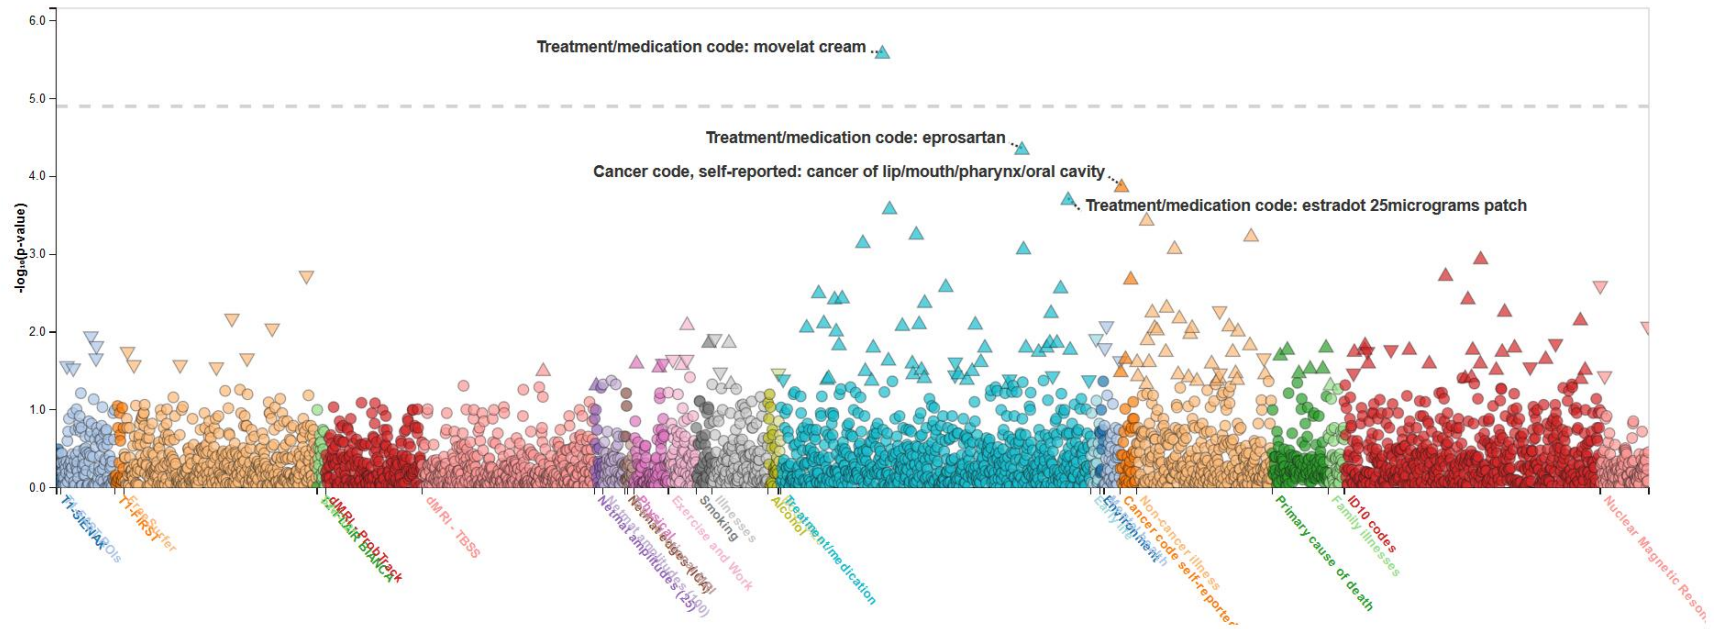

Source: <http://big.stats.ox.ac.uk/variant/4:180164081-A-G>

# 4 : 180,151,019 G / T (rs4146838)

Nearest gene: AGA  
MAF ranges from 5.9e-3 to 9.3e-2  
View on UCSC , GWAS Catalog , dbSNP

**NOTE : p-values in this plot are capped at  $-\log_{10} p\text{-value} = 30$ . Please see table below for actual p-value.**

[Download Image](#)

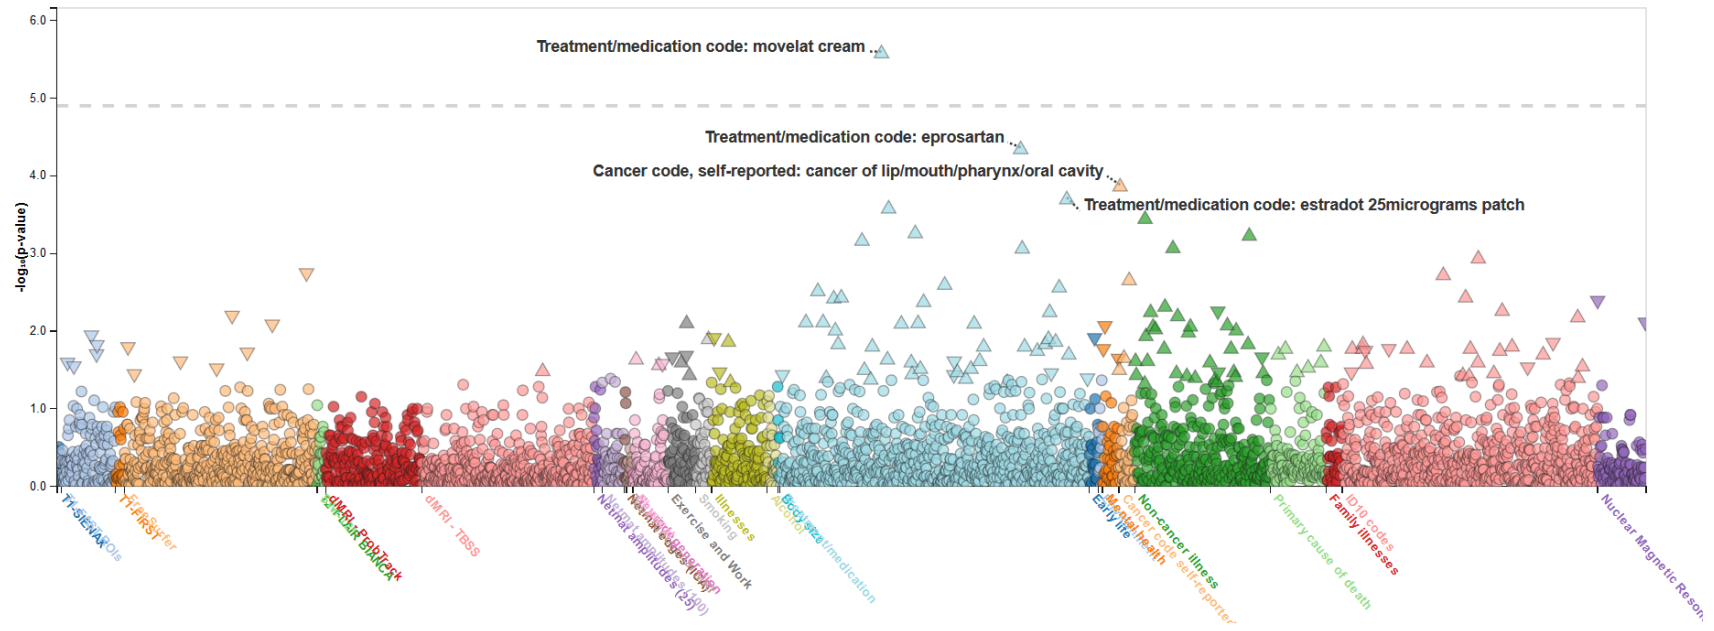

Source: <http://big.stats.ox.ac.uk/variant/4:180151019-G-T>
